# Supplementary material for: NMR and computational studies of the chemical reduction of [2.2]paracyclophane: formation of dianionic p-xylenyl oligomersElectronic Supplementary Information (ESI) available: experimental and computational details, and spectral data for the trapping products. See http://www.rsc.org/suppdata/cc/b3/b311885a/
Source: Royal Society of Chemistry journal article supplement (doi:10.1039/b311885a), 2004-01-01
Supplement: b311885a.doc [file b311885a.doc]

**Supplementary Information**

For the paper by I. D. Gridnev and F. Pichierri

**NMR and Computational Studies on the Chemical Reduction of [2.2]Paracyclophane: Formation of Dianionic *p*-Xylenyl Oligomers**

**EXPERIMENTAL DETAILS**

All manipulations were carried out under an atmosphere of dry argon applying standart Schlenk techniques for preparative scale reactions and purifying of solvents, and WILMAD screw-cap NMR tubes with flat PTFE septa for the NMR measurements. [2.2]Paracyclophane (Aldrich) was powedered and dried before use. The NMR spectra were taken at a Jeol AL300 spectrometer, and the high resolution mass spectra were obtained with a Bruker APEX III FT ICR mass-spectrometer equipped with a 7 Tesla magnet. Preparative GPC separation of the quenching products was performed on a LC-918 chromatograph from Japan Analytical Industry Co., Ltd. in chloroform.

**NMR Experiments.** Tetrahydrofuran-d8 was twice distilled over K/Na alloy (3 : 2 by weight) under argon atmosphere. The metal surface in the distilling flask must remain shining during the second distillation, the receiver also contained the K/Na alloy. 0.3 mL of THF-d8 from the receiver was transferred with a syringe to the NMR tube together with a small amount of K/Na alloy. The contents of the NMR tube were cooled to –90 C, and the solid K/Na alloy was forced to the bottom of the tube with a long needle. Powdered and thoroughly dried [2.2]paracyclophane (5 mg) was dissolved in 0.3 mL of freshly distilled THF-d8, the solution was cooled to –90 C (some paracyclophane can precipitate) and added to the NMR tube with a syringe. Then another 0.2 mL of THF-d8 containing a small amount of K/Na alloy was added to the NMR tube, leaving the second portion of the frozen K/Na alloy on the top of the reaction mixture so that all solution of **1** in THF-d8 remained between two portions of solid K/Na alloy, and a bubble of argon is left to allow mixing. Then the NMR tube was intensively shaken by hand for approximately 1h while taking it for short periods from the cooling bath with the temperature maintained at –60 C. To initiate the reaction (first signs of blue color near the metal surface) the sample was taken from the cooling bath for relatively long period, but the K/Na alloy must remain solid. After that the reaction was carried out in the approximate temperature interval from –50 to –40 C until the solution became completely homogeneous and intensively red-colored. Then the NMR tube was inserted in a precooled to –60 C probe of the NMR spectrometer. Immediate analysis showed that thus obtained solution contained only the dianions **3-5** and hydrocarbon **6** (approximately 20%).

**Quenching experiments.** Tetrahydrofuran and [2.2]paracyclophane were prepared similarly to the previous experiment. K/Na alloy (0.5 g) was suspended in freshly distilled THF (30 mL) in a flask equipped with argon inlet and magnetic stirrer. By applying fast stirring at room temperature and then cooling the flask the metal has been obtained as a suspension of small beads; the sirring must be regulated to avoid their agglomeration. [2.2]Paracyclophane (100 mg, 0.48 mmol) was added to the suspension in one portion under the stream of argon. The reaction mixture was stirred vigourosly for 30 min. at –50 C, then excess of trimethylchlorosilane (300 mg, 2.7 mmol) was added. After the reaction mixture became colorless, it was filtered under argon to remove the excess of K/Na alloy. Then it was poured into water, extracted with chloroform (3 x 100 mL), the organic layers were combined and dried over Na2SO4, the solvents were removed in vacuo to give 126 mg of white solid. It was dissolved in 3 mL of chloroform and the solution was used to separate individual products by preparative GPC. The following fractions were obtained (in order of appearance): **11** (18 mg), **10** (12 mg), **9** (17 mg), **6** (9 mg), **1** (63 mg).

**1,2-di(4-trimethylsilylmethyl)ethane 9:** white solid, m. p. 58-60 C. 1H NMR (300 MHz, CDCl3, 21 C): 0.02 (s, 18H, 6CH3), 2.06 (s, 4H, 2CH2Si), 2.84 (s, 4H, 2CH2), 6.91 (d, 4H, 4CH, 3*J*HH = 7 Hz), 7.02 (d, 4H, 4CH, 3*J*HH = 7 Hz); 13C NMR (75 MHz, CDCl3, 21 C): –1.91 (CH3Si), 26.46 (CH2Si), 37.64 (CH2), 127.86, 128.21 (2 CH), 137.36, 137.70 (2 C tert.); HRMS (m/*z*): 354.2194, calcd. for C22H34Si2 354.2199.

**4,4’-Bis[2-(4-trimethylsilylmethyl)phenyl]diphenylethane 10:** white solid, m.p. 117-119 C. 1H NMR (300 MHz, CDCl3, 21 C): –0.01 (s, 18H, 6CH3), 2.05 (s, 4H, 2CH2Si), 2.84 (s, 8H, 4CH2), 2.87 (4H, 2CH2), 6.93 (d, 4H, 4CH, 3*J*HH = 7.5 Hz), 7.04 (d, 4H, 4CH, 3*J*HH = 7.5 Hz), 7.12 (s, 8H, 8CH); 13C NMR (75 MHz, CDCl3, 21 C): –1.91 (CH3Si), 26.48 (CH2Si), 37.58, 37.63, 37.70 (6CH2), 127.93, 128.17, 128.31, 128.40 (4 CH), 137.22, 137.79, 139.36, 139.55 (4 C tert.); HRMS (m/*z*): 562.3446, calcd. for C38H50Si2 562.3451.

**4,4’-Bis[2-{4-(2-(4-trimethylsilylmethyl)phenyl)ethyl)phenyl}]diphenylethane 11:** white solid, m. p. 195-198 C. 1H NMR (600 MHz, CD2Cl2, 25 C): 0.02 (s, 18H, 6CH3), 2.05 (s, 4H, 2CH2Si), 2.80-2.88 (m, 16H, 8CH2), 6.91 (d, 4H, 4CH, 3*J*HH = 7.5 Hz), 7.03 (d, 4H, 4CH, 3*J*HH = 7.5 Hz), 7.07-7.12 (m, 16H, 16CH); 13C NMR (75 MHz, CDCl3, 21 C): –1.91 (CH3Si), 26.50 (CH2Si), 37.59, 37.63, 37.70 (10CH2), 127.94, 128.18, 128.32, 128.37, 128.40 (20 CH), 137.23, 137.80, 139.34, 139.41, 139.45, 139.56 (12 C tert.); HRMS (m/*z*): 770.4698, calcd. for C54H66Si2 770.4703.

**Quantum chemical calculations.** The cartesian coordinates and total electronic energies (Hartrees) for the optimized structures (B3LYP/6-311++G(d,p)//HF/6-311G*) of **1**, **2**, **3**, **7**, and **8** are reported.

**1**: \C,-1.1832923259,1.5787371075,-0. 6923361777\C,-1.1837663429,1.5787093865,0.6914535049\C,1.1838079807,1. 5786757297,-0.6914565518\C,1.1833345479,1.5787220822,0.6923281788\C,1. 1833284401,-1.5785526907,-0.6923548351\C,-1.1837782648,-1.5789067145,-0.6914246657\C,1.1838341621,-1.5785087331,0.6914343964\C,-1.1832730394,-1.5789410061,0.6923549137\C,0.0011516684,0.800557337,-2.7862637561\C,-0.001307646,-0.8005880923,-2.7862575659\C,-0.0010147147,0.8005888287,2.7862633168\C,0.0009977239,-0.8005619159,2.7862550354\C,0.0005095335,1.4146789934,-1.4006093399\C,-0.0004721114,1.4147204675,1.400612368\C,-0.0005188701,-1.4146827656,-1.4005936226\C,0.0005243897,-1.4146658732,1.4005956595\H,2.125312303,1.5518570591,1.2135001521\H,-2.1261334229,-1.5521447209,-1.2119126769\H,-2.1252721808,1.5518441578,-1.2135041186\H,2.1261488799,1.5517301114,-1.2119601533\H,2.1261845165,-1.5513689926,1.2119126193\H,-2.1252421338,-1.5521626823,1.2135468507\H,-2.1261102743,1.5518627666,1.2119581856\H,2.1252925544,-1.5514718428,-1.2135414 177\H,0.8660950624,1.1387866264,3.3424858758\H,0.870498635,1.1364240259,-3.340390484\H,-0.8707173296,-1.1364579441,-3.3402841934\H,0.8700727606,-1.1366653688,3.3406676625\H,-0.8661609588,-1.1387516832,3.3424019304\H,0.8655176238,-1.1390102598,-3.3427871603\H,-0.8701422702,1.13666 55654,3.3406048633\H,-0.8657345523,1.1389703351,-3.3427030885\\Energy=-619.4522583\

**2**:C,-1.2440346059,1.5827817412,-0.5946491407\C,-1.1629914011,1.6281630536,0.7692569968\C,1.1630599333,1.6292115566,-0.7668127092\C,1.2441043336,1.5821198596,0.5970266096\C,1.2298483045,-1.582817218,-0.6015233126\C,-1.1295408337,-1.5935002968,-0.7798316274\C,1.1294540254,-1.59445492,0.7774476568\C,-1.2299285254,-1.5836592879,0.5991463737\C,-0.2098489706,0.7334922548,-2.7581215335\C,0.2104769248,-0.8030452958,- 2.7672453364\C,0.2100053346,0.7295706824,2.7592588241\C,-0.2106029477,-0.8068144043,2.7659923927\C,-0.1125746025,1.4711537299,-1.4406599702\C,0.112659008,1.4693236253,1.4429296175\C,0.1020010114,-1.4346890015,-1.3977815524\C,-0.1020787761,-1.436476387,1.3955960789\H,2.2293560357, 1.5847518499,1.0533668347\H,-2.0313635583,-1.5368786261,-1.3673869564\H,-2.2292680664,1.5860621379,-1.0510203718\H,2.0700599817,1.7238754503,-1.351417483\H,2.0312766963,-1.5384529027,1.3650594637\H,-2.2066157793,-1.5174642013,1.0475626872\H,-2.0700159508,1.7220308094,1.3539551256\H,2.2065373709,-1.5160965211,-1.0498549382\H,1.240109737,0.783759833,3.1091346039\H,0.3921068873,1.2103455788,-3.5366176381\H,-0.4014766519,-1.3267183606,-3.5018288451\H,0.4010562924,-1.3317474495,3.499940193\H,-1.2381571592,-0.8916715801,3.1095281258\H,1.2379397279,-0.8875985845,-3.1111217392\H,-0.3917221303,1.2052685373,3.538649152\H,-1.2398727083,0.788375875,-3.1081244203\\Energy=-619.4 343783\

**3**:C,-4.0112981537,-1.0054011625,0.8196349036\C,-2.6372333542,-1.0164783882,0.8274903481\C,-3.9517470 139,1.3729808772,0.5219761585\C,-2.5787706644,1.3179203177,0.535390478\C,3.9517706006,-1.3729562256,-0.5219206169\C,4.0112755057,1.005412384,-0.8196956\C,2.5787974854,-1.3179215737,-0.5352749208\C,2.6372058755,1.0164492622,-0.8276079103\C,-6.1617200401,0.23681844,0.6584102421\C,6.1617213799,-0.236763124,-0.6584020831\C,-0.3354404568,0.0949602412,0.6906750695\C,0.3354386986,-0.09502815,-0.6906736178\C,-4.7792238638,0. 2028554054,0.6634990101\C,-1.8510146639,0.132475068,0.6870576808\C,4.7792248457,-0.2028167612,-0.6635009369\C,1.8510140044,-0.1325017462,-0.6870608408\H,-2.0339072088,2.2477306867,0.4283452688\H,4.5441624043,1.937898364,-0.9408195731\H,-4.54420811,-1.9378959599,0.9405888205\H,-4.4372915317,2.3316520365,0.4063647449\H,2.0339550972,-2.2477544321,-0.4 283173377\H,2.1394753121,1.9696498308,-0.956273852\H,-2.1395241462,-1. 9696806432,0.9562269444\H,4.4373386704,-2.3315932843,-0.406126005\H,0. 0571310345,1.0128670745,1.1276976364\H,-6.7003971336,1.16483355,0.5360 479063\H,6.7461839068,0.6651110254,-0.7650967776\H,-0.057120634,-1.0129476379,-1.1276846512\H,-0.0141717093,0.7048287192,-1.3431046584\H,6.7004079999,-1.1647389753,-0.5357858375\H,0.0141567269,-0.7049104214,1.3430987602\H,-6.7461917872,-0.6650791195,0.7648544265\\Energy=-619.4131693\

**7**:C,-1.2521897016,1.4705112057,-0.6095696523\C,-1.1488224168,1.5260635171,0.8202690553\C,1.1479117289,1.535997817,-0.8027377515\C,1.2513235882,1.464225836,0.6264056205\C,1.2522976138,-1.4635533467,-0.6261776238\C,-1.1477759894,-1.5265611663,-0.8204490432\C,1.1486600181,-1.5353413366,0.8029318033\C,-1.2514439346,-1.4712365615,0.6093454692\C,-0.212496131,0.7812827261,-2.7667199818\C,0.212980678,-0.7496160005,-2.7754749104\C,0.2120228654,0.7497176105,2.7755011315\C,-0.2125074942,-0.781460433,2.7666800334\C,-0.1277161069,1.3898378683,-1.3893523769\C,0.1269291909,1.3739872841,1.4052010702\C,0.1279852201,-1.3738801675,-1.4051690815\C,-0.1271469691,

-1.3899420951,1.3893228883\H,2.2152816751,1.2598135653,1.0716642632\H,-2.0358077035,-1.4507751391,-1.4305637506\H,-2.216047571,1.2708847882,-1.0572103827\H,2.0360781073,1.4668834338,-1.413453452\H,2.0366746287,-1.4657145452,1.4138103677\H,-2.215473962,-1.2720253769,1.0568020246\H,-2.0369 21407,1.4495513285,1.4301972935\H,2.2162225321,-1.2586249325,-1.071270 4921\H,1.2235245116,0.8489425751,3.1708044664\H,0.44174118,1.3073944612,-3.4732160601\H,-0.4411672183,-1.2675909283,-3.4880386805\H,0.4419551465,-1.3071833871,3.4732503472\H,-1.2240911904,-0.8852134616,3.1605942747\H,1.2246307777,-0.8482229201,-3.1705616817\H,-0.4425814195,1.2672 870659,3.4879314486\H,-1.224091045,0.884396927,-3.160779888\\Energy=-619.3304833\

**8**: C,-3.9251868859,-1.021244168,0.825092635\C,-2.5536646934,-1.029269932,0.8873877116\C,-3.8649741 418,1.3852165288,0.5233182064\C,-2.494362341,1.3408294509,0.590175801\C,3.8648953358,-1.3853185283,-0.5237155647\C,3.9252634571,1.0212396437,-0.8246790417\C,2.4942859871,-1.340820214,-0.5905793627\C,2.553742331,1.0293744376,-0.8869979386\C,-6.0494369826,0.2245564742,0.583782108\C,6.0494344884,-0.224765824,-0.5837556515\C,-0.28888933,0.0992985707,0.7343166642\C,0.2888931411,-0.0990954103,-0.734345607\C,-4.6679336532,0.1971028879,0.6405492181\C,-1.7769564985,0.1432721758,0.7881132123\C,4.6679305945,-0.1972167625,-0.6405337035\C,1.7769595458,-0.1431550162,-0.7881289988\H,-1.9435594284,2.2648034024,0.4965291581\H,4.4696052,1.9462395542,-0.9255738768\H,-4.469466827,-1.9462447835,0.9263108864\H,-4.3624154756,2.3322285641,0.3897802143\H,1.9434192286,-2.2647878259,-0. 4972471846\H,2.0497492277,1.9739243788,-1.027347118\H,-2.0496105462,-1.9737416527,1.0280422467\H,4.3622746912,-2.3324072765,-0.3904898802\H, 0.1419821665,1.0157382502,1.1266583786\H,-6.5864577867,1.1473816556,0. 4463527937\H,6.6321379774,0.6758317103,-0.6746755916\H,-0.1420077237,-1.0155117726,-1.1267054869\H,-0.0986862488,0.7124848771,-1.343085035\H,6.5864032159,-1.1476670713,-0.4466289774\H,0.0987201163,-0.7122561762,1.343068292\H,-6.6320899139,-0.6760417202,0.675013052\\Energy=-619.4709583\
